# Supplementary material
Source: publisher figshare collection journal article supplement (https://acs.figshare.com/ndownloader/files/4761733)
Supplement: Supplementary file 1 [file 4761733]

## Supplementary Data

### S-Figure 1

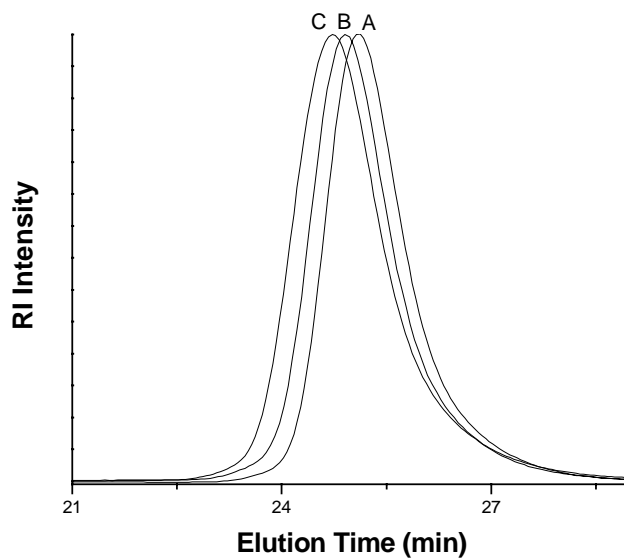

Aqueous, cationic SEC-MALLS traces demonstrating the efficient blocking of (A) poly(HPMA<sub>258</sub>) with DMAPMA, resulting in (B) poly(HPMA<sub>258</sub>-*b*-DMAPMA<sub>23</sub>) and (C) poly(HPMA<sub>258</sub>-*b*-DMAPMA<sub>53</sub>).
